# Supplementary material for: Inferring directional relationships in microbial communities using signed Bayesian networks
Source: PubMed Central journal article supplement (PMC7751116; doi:10.1186/s12864-020-07065-0), 2020-12-21

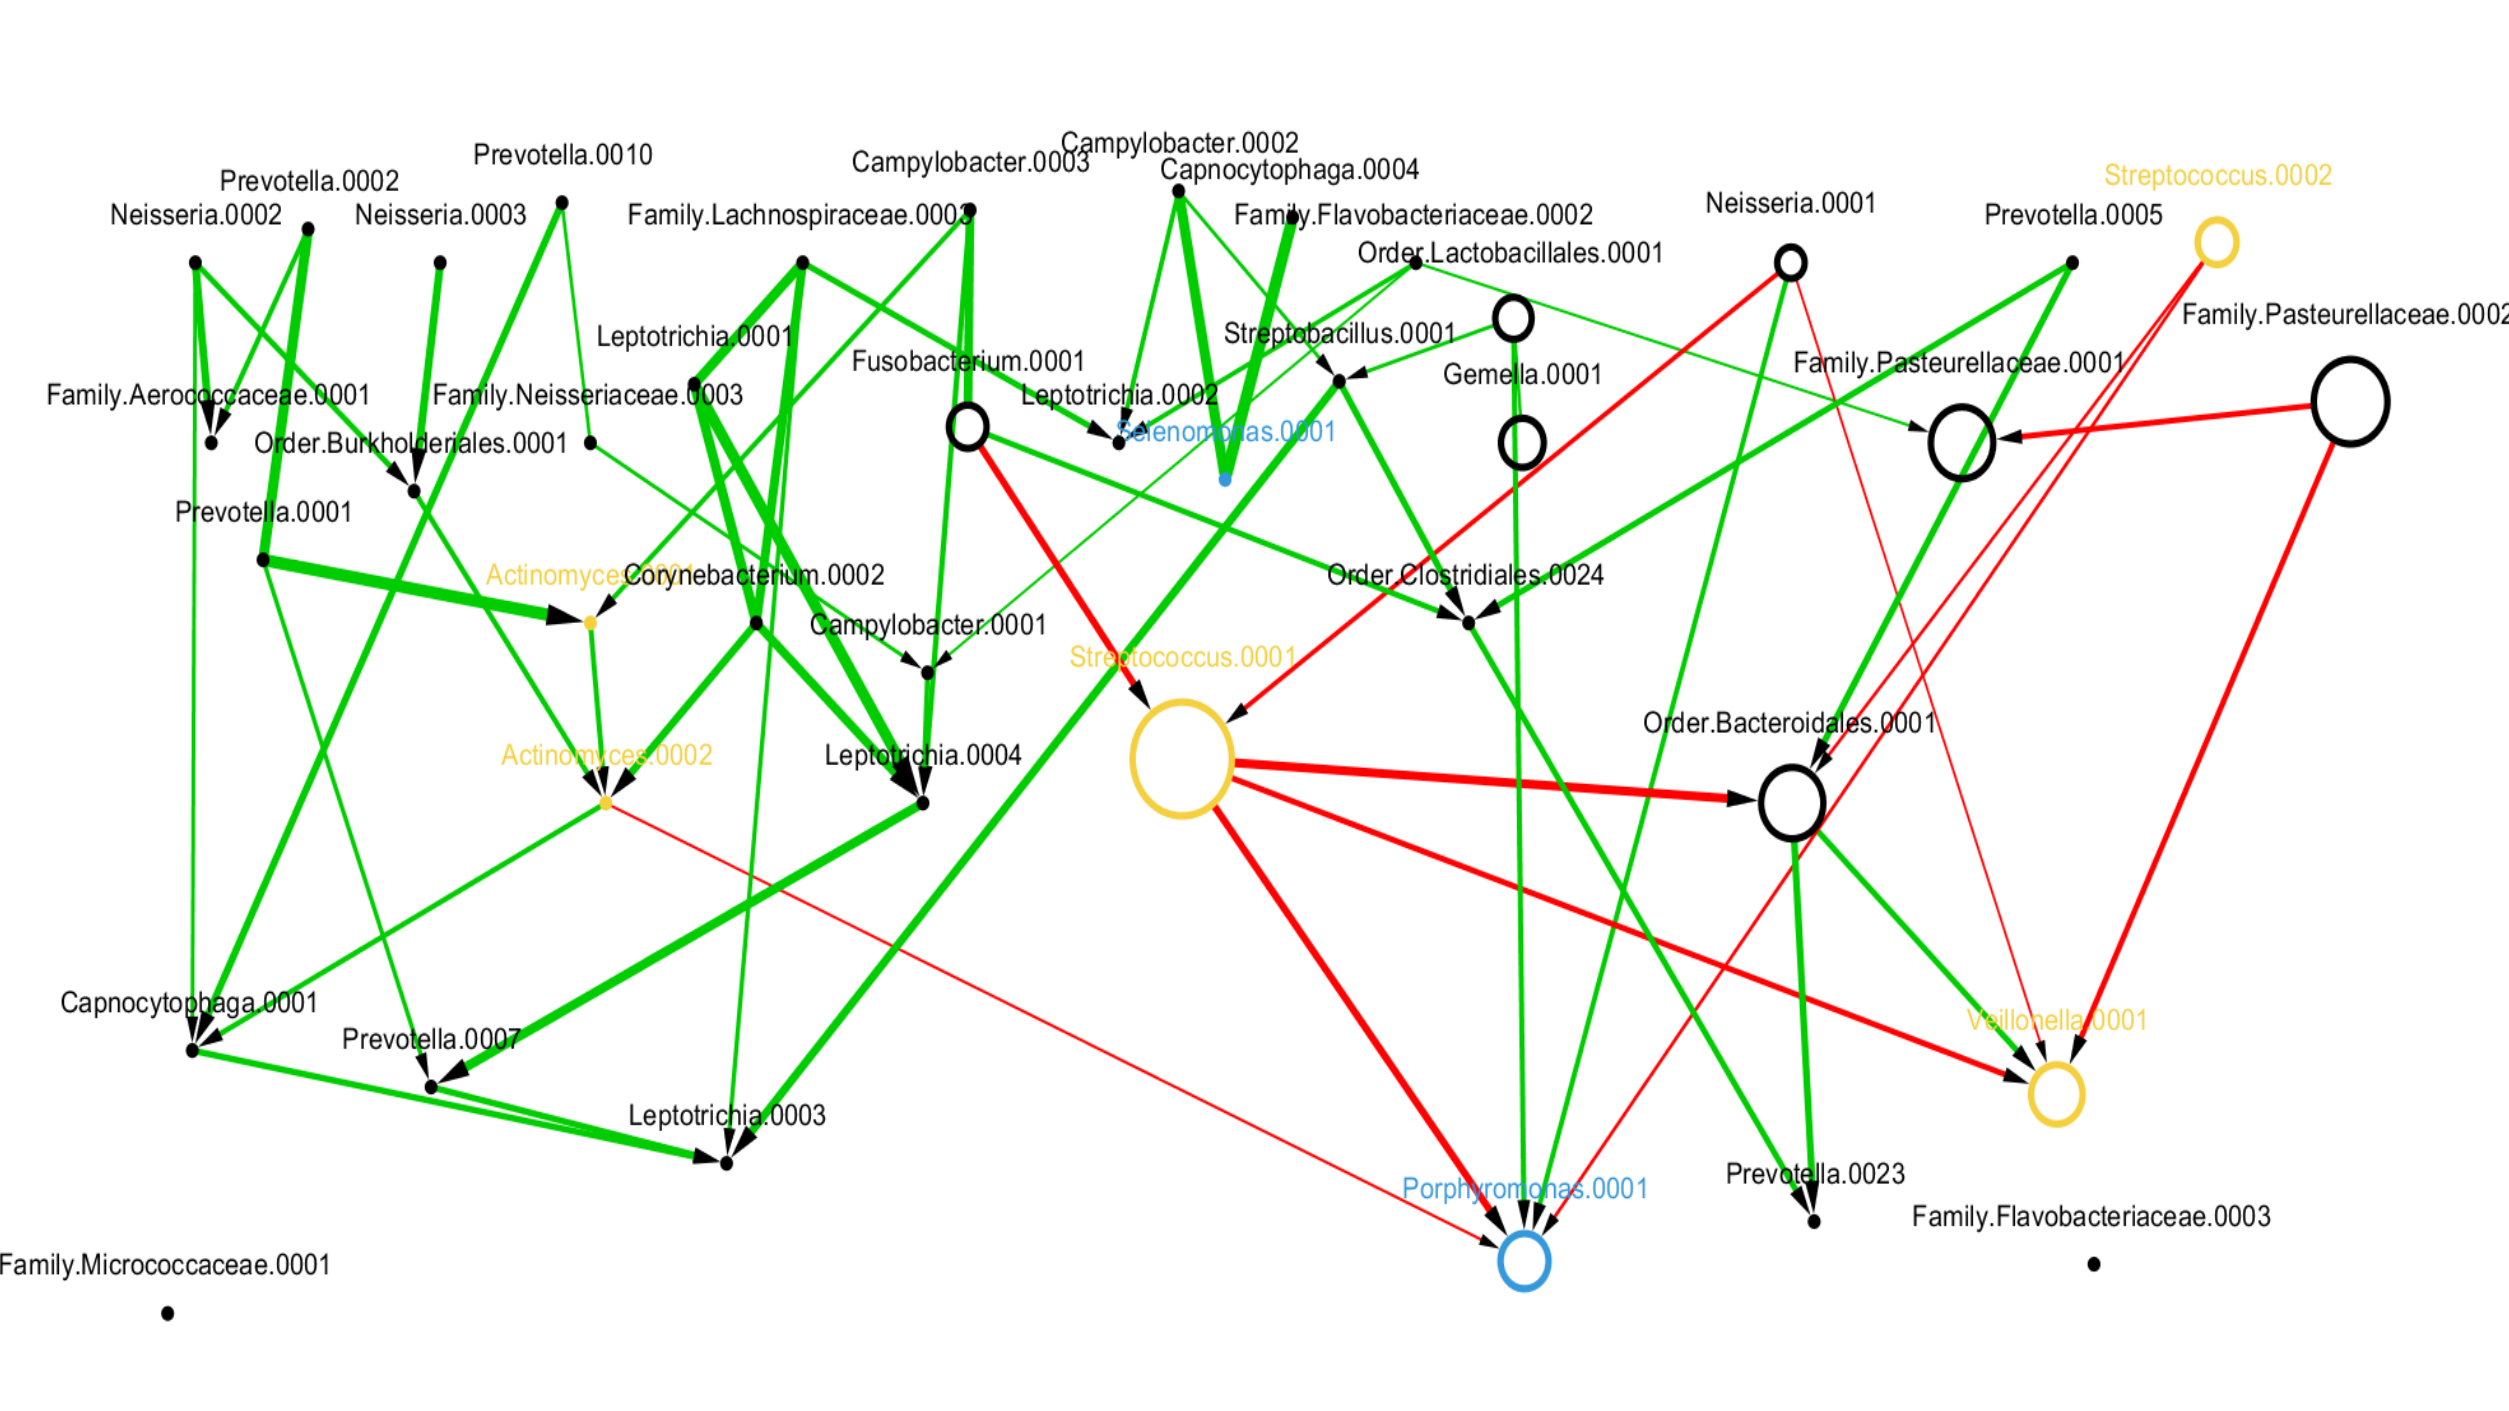

Supplement: 12864_2020_7065_MOESM7_ESM.pdf [file 12864_2020_7065_MOESM7_ESM.pdf]
